# Supplementary material for: Gene Expression Patterns of Dengue Virus-Infected Children from Nicaragua Reveal a Distinct Signature of Increased Metabolism
Source: PLoS Negl Trop Dis. 2010 Jun 15;4(6):e710. doi: 10.1371/journal.pntd.0000710 (PMC2886038; doi:10.1371/journal.pntd.0000710)
Supplement: Table S5 — Identification of genes that are significantly different between patients of different clinical classifications by two-way supervised comparisons using SAM. (0.03 MB XLS) [file pntd.0000710.s006.xls]

## Sheet: DF vs DSS
TWO-WAY COMPARISONS	GENE SYMBOL	FOLD CHANGE
DF vs DSS Up and Downregulated	RPL22L1	2.82674
(Top 100 Differentially Expressed	NDUFB3	2.81603
Genes between DF vs DSS)	IFI44	2.79469
	SPCS3	2.75619
	SAR1B	2.64054
	GP9	-2.6131
	GFI1B	-2.52564
	RPS27L	2.46047
	PDCD10	2.45785
	TUBB2A	-2.45746
	LSM8	2.44296
	HAT1	2.43334
	MXI1	-2.42423
	IFIH1	2.41722
	C16ORF35	-2.38952
	TXNDC1	2.36943
	HBA2	-2.36019
	SUB1	2.33796
	PSMA4	2.28934
	C1GALT1C1	2.28439
	MRPL1	2.27472
	PTAFR	-2.26096
	FMR1	2.24724
	NFE2	-2.24437
	IMMP1L	2.2342
	ZNF184	2.22588
	ZNHIT3	2.21962
	CTTN	-2.21353
	STCH	2.21303
	C14ORF112	2.19251
	COMMD6	2.18877
	SNRPG	2.17567
	MGC31957	-2.17372
	TNFRSF17	2.17328
	C15ORF15	2.17226
	MRPS18C	2.1674
	COX6C	2.16718
	PADI2	-2.16024
	IER3IP1	2.16012
	FAM3C	2.14889
	SLC25A37	-2.14845
	ZNF644	2.14325
	SENP7	2.14166
	MCEE	2.13843
	DDX3Y	2.13783
	HBA2	-2.11917
	CCL3L3	2.1181
	MRPL50	2.11764
	CCNC	2.11696
	TMCO1	2.11646
	KIAA0776	2.10204
	C13ORF7	2.10005
	PPAT	2.09751
	IL8RB	-2.0906
	C2ORF30	2.09049
	CLU	-2.08412
	BUB1	2.08254
	TATDN1	2.08083
	LSM3	2.08029
	ABHD13	2.07827
	PTAR1	2.0776
	TPD52	2.06281
	PSMA3	2.06278
	MRPL47	2.05743
	DPM1	2.0555
	MPP1	-2.0553
	RB1	2.05132
	BET1	2.04974
	CASP3	2.04692
	BIRC2	2.04539
	TMED5	2.03888
	MRPL32	2.03814
	COX7B	2.03627
	ANPEP	-2.03308
	ACRBP	-2.0254
	ZC3H15	2.02529
	RXRA	-2.02431
	B3GNT2	2.02342
	NDUFS4	2.0202
	CKS2	2.01904
	FPR1	-2.01586
	HSP90AA1	2.01535
	OLIG1	-2.01504
	LYL1	-2.01464
	MTX2	2.01444
	SECTM1	-2.01356
	CEP57	2.01306
	EDEM3	2.01287
	MYNN	2.00139
	TMEM123	1.99557
	LOC439992	1.99372
	RNF24	-1.99313
	DGAT2	-1.99124
	LOC388312	-1.98964
	TIMM8B	1.98731
	MRPL13	1.98731
	RPL26L1	1.98711
	PXMP3	1.9849
	SORL1	-1.98454
	MORC3	1.98313
TWO-WAY COMPARISONS	GENE SYMBOL	FOLD CHANGE
DHF vs DSS Up and Downregulated	EAF2	5.06913
(Top 100 Differentially Expressed	HBA2	-4.32533
Genes between DHF vs DSS)	STCH	4.18705
	CCNC	3.95429
	ZNF92	3.83688
	SAR1B	3.69339
	SPCS3	3.67568
	HBA2	-3.6691
	MCEE	3.60609
	RPL22L1	3.53268
	TXNDC1	3.40695
	RPS27L	3.32484
	KIAA0776	3.25103
	LSM8	3.13043
	MBNL2	3.0706
	LOC441533	3.06483
	CKS2	3.04108
	CASP3	2.98726
	PCTK2	2.94438
	SUB1	2.90724
	MRPL1	2.86277
	HLTF	2.85282
	MRPL13	2.85115
	KIAA1370	2.81312
	BDP1	2.80779
	RPS7	2.80376
	TPD52	2.7928
	IER3IP1	2.79061
	LOC400652	2.78156
	PSMC6	2.77388
	MYT1	2.74328
	DNAJB9	2.72854
	TXNDC9	2.72825
	IMMP1L	2.72781
	SENP7	2.71748
	MGC5370	2.70872
	RPL26	2.68966
	TMED5	2.68574
	NUDCD2	2.67318
	NDUFB3	2.6624
	LYPLA1	2.65266
	LMAN1	2.65184
	ITGA4	2.65094
	MEX3C	2.61474
	EDEM3	2.61095
	LOC388272	2.60727
	EIF2AK3	2.60173
	HAT1	2.60021
	C2ORF30	2.59526
	C1ORF9	2.59153
	COMMD6	2.58687
	PPAT	2.56626
	CASC4	2.56405
	TNFRSF10C	-2.55949
	RP6-213H19.1	2.55469
	ANP32E	2.54288
	MTX2	2.54247
	CYCSL1	2.54145
	SNRPG	2.54067
	C15ORF15	2.54041
	MTDH	2.53841
	RAP2A	2.53208
	PTS	2.52938
	GRN	-2.52332
	COG6	2.51912
	SERP1	2.51827
	SEC11C	2.51804
	IL8RB	-2.51479
	PXMP3	2.51369
	PTBP2	2.50704
	UAP1	2.50123
	LOC202459	2.501
	C9ORF41	2.50062
	LOC439992	2.49751
	USP1	2.49121
	DNAJC15	2.4908
	STT3B	2.48921
	TMEM161B	2.48115
	C1GALT1C1	2.47858
	FUSIP1	2.47535
	TWF1	2.46632
	ZNF644	2.46613
	CHMP5	2.44576
	ACADM	2.44436
	DCK	2.44372
	C9ORF82	2.44246
	HMGB1	2.44246
	RB1	2.44197
	LSM3	2.42876
	CRLS1	2.4179
	KLHL5	2.41097
	ZNF184	2.40279
	IMPA1	2.40213
	USO1	2.40061
	DCUN1D5	2.40043
	BMI1	2.39688
	NUS1	2.39471
	SUZ12	2.39112
	TIMM17A	2.39106
	SELK	2.38608
TWO-WAY COMPARISONS	GENE SYMBOL	FOLD CHANGE
DF+DHF vs DSS Up and Downregulated	PDZK1IP1	-2.97991
(Top 100 Differentially Expressed	RPL22L1	2.95111
Genes between DF+DHF vs DSS)	SPCS3	2.9242
	SAR1B	2.84642
	NDUFB3	2.77902
	HBA2	-2.71349
	RPS27L	2.66135
	HBA2	-2.65886
	LSM8	2.63352
	PDCD10	2.56896
	IFI44	2.55916
	GP9	-2.55349
	TXNDC1	2.54853
	SUB1	2.53837
	MBNL2	2.51243
	STCH	2.48419
	HAT1	2.48065
	CHMP5	2.47386
	GFI1B	-2.46554
	CCNC	2.4307
	MRPL1	2.41003
	C16ORF35	-2.39212
	MCEE	2.36224
	PSMC6	2.34089
	KIAA0776	2.32834
	C1GALT1C1	2.32646
	IMMP1L	2.31967
	PSMA4	2.2995
	SECTM1	-2.29887
	TUBB2A	-2.29437
	IER3IP1	2.29243
	PADI2	-2.27916
	ANP32E	2.27199
	ZNF184	2.27116
	ZNHIT3	2.26662
	SENP7	2.25342
	SNRPG	2.24692
	NFE2	-2.24674
	C15ORF15	2.23645
	COMMD6	2.23092
	PTAFR	-2.22981
	ZNF644	2.22587
	PPAT	2.22119
	CASP3	2.2203
	FMR1	2.21019
	SNCA	-2.20319
	C14ORF112	2.20205
	IL8RB	-2.20131
	COX6C	2.20053
	TPD52	2.19523
	MRPS18C	2.17409
	MGC31957	-2.17295
	TMED5	2.16034
	MRPL50	2.15323
	CTTN	-2.14493
	LSM3	2.13805
	TATDN1	2.13747
	MRPL13	2.13611
	TMCO1	2.13554
	MRPS33	2.13107
	PTAR1	2.131
	DPM1	2.13071
	RB1	2.12995
	EDEM3	2.12521
	PXMP3	2.12296
	MTX2	2.11474
	TNFRSF17	2.11243
	DDX3Y	2.1116
	COX7B	2.11077
	MRPL32	2.11064
	HLTF	2.10295
	MXI1	-2.10174
	BIRC2	2.10166
	FPR1	-2.09847
	ANPEP	-2.09589
	RPL26L1	2.09564
	CKS2	2.09563
	SLC25A37	-2.08678
	LOC439992	2.08629
	KIAA1370	2.08302
	HSP90AA1	2.07974
	MEX3C	2.07736
	PSMA3	2.07473
	DNAJB9	2.07464
	MYNN	2.07287
	RXRA	-2.06878
	BET1	2.06839
	CCL3L3	2.06736
	NUDCD2	2.06396
	COG6	2.06391
	TIMM17A	2.0636
	ALS2CR2	-2.0619
	ZC3H15	2.06032
	LYL1	-2.05827
	TIMM8B	2.05055
	SNRPE	2.04939
	GRN	-2.04528
	MRPL47	2.04291
	ERGIC2	2.04082
	TNFRSF10C	-2.03737
