# Supplementary material for: Gene Expression Patterns of Dengue Virus-Infected Children from Nicaragua Reveal a Distinct Signature of Increased Metabolism
Source: PLoS Negl Trop Dis. 2010 Jun 15;4(6):e710. doi: 10.1371/journal.pntd.0000710 (PMC2886038; doi:10.1371/journal.pntd.0000710)
Supplement: Table S11 — Identification of genes that significantly different between in vitro and in vivo studies by two-way comparisons through meta-analysis. Genes that are relatively upregulated in in vitro studies are shown in red and genes that are relatively upregulated in in vivo studies are shown in green. (0.30 MB XLS) [file pntd.0000710.s012.xls]

## Sheet: Sheet1
Genes more highly expressed in in vitro studies (120)
Gene ID	Gene Name	Score(d)	Numerator(r)	Denominator(s+s0)	Fold Change	q-value(%)
5407	(IFIT1) interferon-induced protein with tetratricopeptide repeats 1	13.9459	11.5752	0.830004	3051.28	0
24368	(HERC5) hect domain and RLD 5	8.43152	9.4665	1.12275	707.458	0
7532	(MX1) myxovirus (influenza virus) resistance 1, interferon-inducible protein p78 (mouse)	7.70567	9.1024	1.18126	549.662	0
5411	(IFIT3) interferon-induced protein with tetratricopeptide repeats 3	6.96767	6.8827	0.987804	118.005	0
8090	(OASL) 2'-5'-oligoadenylate synthetase-like	6.62248	6.05903	0.914918	66.673	0
225	(ADAR) adenosine deaminase, RNA-specific	5.71608	2.669	0.466929	6.35988	0
6727	(LY6E) lymphocyte antigen 6 complex, locus E	5.6695	4.2137	0.743223	18.5545	0
9437	(EIF2AK2) eukaryotic translation initiation factor 2-alpha kinase 2	5.52421	3.61979	0.655259	12.2932	0
26072	(HERC6) hect domain and RLD 6	5.09739	5.15217	1.01075	35.5596	0
12412	(TUBB2A) tubulin, beta 2A	4.99575	2.13058	0.426478	4.37893	0
12490	(UBE2L6) ubiquitin-conjugating enzyme E2L 6	4.89635	4.053	0.827759	16.5987	0
13328	(IFIT5) interferon-induced protein with tetratricopeptide repeats 5	4.8637	4.1136	0.845776	17.3108	0
16379	(TRIM22) tripartite motif-containing 22	4.82172	3.2987	0.684133	9.84028	0
18873	(IFIH1) interferon induced with helicase C domain 1	4.70617	6.7212	1.42817	105.507	0
1348	(SAMD9) sterile alpha motif domain containing 9	4.57897	4.9939	1.09062	31.865	0
16938	(IFI44) interferon-induced protein 44	4.55881	4.5183	0.991115	22.9163	0
12616	(USP18) ubiquitin specific peptidase 18	4.41927	5.1796	1.17205	36.2422	0
19102	(DDX58) DEAD (Asp-Glu-Ala-Asp) box polypeptide 58	4.39775	5.20738	1.1841	36.9468	0
3569	(ACSL1) acyl-CoA synthetase long-chain family member 1	4.39496	3.0086	0.684557	8.04783	0
8088	(OAS3) 2'-5'-oligoadenylate synthetase 3, 100kDa	4.35854	5.0171	1.1511	32.3815	0
11312	(TRIM21) tripartite motif-containing 21	4.27027	2.4459	0.572774	5.44865	0
23721	(ZC3HAV1) zinc finger CCCH-type, antiviral 1	4.26557	3.0671	0.719036	8.38087	0
7854	(NMI) N-myc (and STAT) interactor	4.23361	2.6078	0.615975	6.09573	0
11362	(STAT1) signal transducer and activator of transcription 1, 91kDa	4.23083	4.3176	1.02051	19.9401	0
4376	(GMPR) guanosine monophosphate reductase	4.18791	3.92846	0.938047	15.2259	0
5393	(IER5) immediate early response 5	4.05063	2.5148	0.620842	5.71518	0
10632	(CCL5) chemokine (C-C motif) ligand 5	4.019	4.4082	1.09684	21.2325	0
9108	(PMAIP1) phorbol-12-myristate-13-acetate-induced protein 1	3.9738	3.0264	0.761588	8.14774	0
7112	(MKRN1) makorin ring finger protein 1	3.89551	2.7784	0.713231	6.86091	0
29090	(SMCHD1) structural maintenance of chromosomes flexible hinge domain containing 1	3.82216	3.30309	0.864194	9.87027	0
3319	(ELF4) E74-like factor 4 (ets domain transcription factor)	3.80877	1.5644	0.410736	2.95754	0
6206	(JUND) jun D proto-oncogene	3.79079	1.6809	0.443417	3.20628	0
937	(BAG1) BCL2-associated athanogene	3.70597	2.4848	0.670486	5.59757	0
25234	(C1orf63) chromosome 1 open reading frame 63	3.69466	1.40166	0.379373	2.64205	0
13009	(ZNF217) zinc finger protein 217	3.64331	1.7786	0.488182	3.43093	0
7183	(MNDA) myeloid cell nuclear differentiation antigen	3.57928	3.796	1.06055	13.8902	0
2428	(CSDA) cold shock domain protein A	3.56706	2.6916	0.75457	6.46029	0
960	(BAZ1A) bromodomain adjacent to zinc finger domain, 1A	3.56673	1.7965	0.503683	3.47376	0
17142	(OPTN) optineurin	3.55568	2.15519	0.606127	4.45428	0
7978	(NR3C1) nuclear receptor subfamily 3, group C, member 1 (glucocorticoid receptor)	3.55059	1.53565	0.432505	2.89919	0
4670	(GTPBP2) GTP binding protein 2	3.54606	1.8654	0.526049	3.64369	0
7533	(MX2) myxovirus (influenza virus) resistance 2 (mouse)	3.5424	5.20326	1.46885	36.8415	0
15990	(GCA) grancalcin, EF-hand calcium binding protein	3.52809	2.5077	0.710782	5.68713	0
30784	(SERTAD2) SERTA domain containing 2	3.52659	1.4497	0.411078	2.73151	0
5995	(IL1RAP) interleukin 1 receptor accessory protein	3.51861	2.26096	0.642572	4.79309	0
21378	(OGFRL1) opioid growth factor receptor-like 1	3.4967	2.0053	0.573483	4.01472	0
6564	(LGALS3BP) lectin, galactoside-binding, soluble, 3 binding protein	3.48977	3.3809	0.968802	10.4172	0
29116	(TMCC1) transmembrane and coiled-coil domain family 1	3.46039	1.863	0.538378	3.63763	0
13632	(MAML1) mastermind-like 1 (Drosophila)	3.44584	1.3703	0.397668	2.58524	0
29095	(TSC22D2) TSC22 domain family, member 2	3.43154	1.7528	0.510791	3.37012	0
1119	(BST2) bone marrow stromal cell antigen 2	3.4308	3.0144	0.878629	8.08025	0
1734	(CDC34) cell division cycle 34 homolog (S. cerevisiae)	3.42814	1.8787	0.548023	3.67744	0
7733	(NEDD9) neural precursor cell expressed, developmentally down-regulated 9	3.40373	1.9245	0.565409	3.79605	0
6116	(IRF1) interferon regulatory factor 1	3.40245	2.6155	0.768712	6.12836	0
24040	(ADIPOR1) adiponectin receptor 1	3.37558	1.933	0.572643	3.81848	0
11925	(TNFSF10) tumor necrosis factor (ligand) superfamily, member 10	3.37083	3.94332	1.16984	15.3836	0
11896	(TNFAIP3) tumor necrosis factor, alpha-induced protein 3	3.36751	2.6374	0.78319	6.22209	0
16276	(TRIM5) tripartite motif-containing 5	3.36362	2.87063	0.853435	7.31386	0
9275	(PPM1A) protein phosphatase 1A (formerly 2C), magnesium-dependent, alpha isoform	3.36191	1.62135	0.482272	3.07664	0
17817	(IFI44L) interferon-induced protein 44-like	3.35666	6.27578	1.86965	77.4815	0
17174	(NAGK) N-acetylglucosamine kinase	3.34152	1.50322	0.449862	2.83475	0
26097	(VPS37C) vacuolar protein sorting 37 homolog C (S. cerevisiae)	3.33843	1.3437	0.402495	2.53801	0
1093	(BPGM) 2,3-bisphosphoglycerate mutase	3.33079	2.84627	0.854533	7.19139	0
4805	(HAGH) hydroxyacylglutathione hydrolase	3.30411	1.27927	0.387174	2.42716	0
7562	(MYD88) myeloid differentiation primary response gene (88)	3.29848	2.2681	0.68762	4.81688	0
5409	(IFIT2) interferon-induced protein with tetratricopeptide repeats 2	3.29599	5.08354	1.54234	33.9077	0
12613	(USP15) ubiquitin specific peptidase 15	3.29133	2.1147	0.642505	4.331	0
13586	(FBXO7) F-box protein 7	3.27411	1.50924	0.460961	2.8466	0
2235	(KLF6) Kruppel-like factor 6	3.27287	2.1156	0.646406	4.3337	0
10704	(SEC24B) SEC24 family, member B (S. cerevisiae)	3.22671	1.59711	0.494966	3.02537	0
29786	(SLC25A37) solute carrier family 25, member 37	3.19887	2.03605	0.63649	4.1012	0
5412	(IFITM1) interferon induced transmembrane protein 1 (9-27)	3.19603	4.5308	1.41764	23.1157	0
20797	(CYBRD1) cytochrome b reductase 1	3.19597	1.7659	0.552539	3.40086	0
12031	(TRAF1) TNF receptor-associated factor 1	3.17934	1.4035	0.441443	2.64543	0
28867	(IGF2BP2) insulin-like growth factor 2 mRNA binding protein 2	3.16566	2.17813	0.688048	4.52566	0
928	(B4GALT5) UDP-Gal:betaGlcNAc beta 1,4- galactosyltransferase, polypeptide 5	3.16453	1.14659	0.362325	2.2139	0
8060	(NUMB) numb homolog (Drosophila)	3.15605	1.6777	0.531582	3.19918	0
10637	(CXCL10) chemokine (C-X-C motif) ligand 10	3.15294	4.2323	1.34234	18.7953	0
3647	(FECH) ferrochelatase (protoporphyria)	3.15236	1.58594	0.503096	3.00204	0
16283	(TRIM14) tripartite motif-containing 14	3.13859	2.1772	0.693687	4.52275	0
24310	(PLEKHO1) pleckstrin homology domain containing, family O member 1	3.13756	1.4902	0.474955	2.80928	0
16257	(TUBB1) tubulin, beta 1	3.1176	2.89334	0.928067	7.42989	0
9998	(RGS2) regulator of G-protein signaling 2, 24kDa	3.1119	2.7075	0.870047	6.53189	0
11847	(TLR1) toll-like receptor 1	3.10863	2.02063	0.650008	4.05762	0
15550	(ARID4B) AT rich interactive domain 4B (RBP1-like)	3.10752	1.28056	0.412085	2.42934	0
4693	(GUK1) guanylate kinase 1	3.08868	1.5619	0.505686	2.95242	0
4963	(HLA-F) major histocompatibility complex, class I, F	3.08707	1.6183	0.524219	3.07013	0
22916	(ZCCHC2) zinc finger, CCHC domain containing 2	3.08268	2.71136	0.879546	6.54939	0
6174	(ITM2B) integral membrane protein 2B	3.07565	1.70777	0.555254	3.26655	0
3531	(F13A1) coagulation factor XIII, A1 polypeptide	3.0706	1.60612	0.523064	3.04432	0
10630	(CCL4) chemokine (C-C motif) ligand 4	3.06976	2.8615	0.932157	7.26771	0
445	(SETX) senataxin	3.06625	1.4818	0.483261	2.79297	0
8827	(PELI1) pellino homolog 1 (Drosophila)	3.04978	2.15031	0.705072	4.43924	0
7794	(NFKB1) nuclear factor of kappa light polypeptide gene enhancer in B-cells 1	3.04179	1.2176	0.40029	2.3256	0
6953	(CD46) CD46 molecule, complement regulatory protein	3.03367	2.25215	0.742384	4.76392	0
17760	(TREM1) triggering receptor expressed on myeloid cells 1	3.00044	1.8109	0.603545	3.50861	0
9677	(PTPRN2) protein tyrosine phosphatase, receptor type, N polypeptide 2	2.99909	2.33149	0.777397	5.03323	0
11364	(STAT3) signal transducer and activator of transcription 3 (acute-phase response factor)	2.99857	1.144	0.381515	2.20993	0
2068	(CLK1) CDC-like kinase 1	2.97489	1.6104	0.541331	3.05336	0
2888	(DISC1) disrupted in schizophrenia 1	2.96646	2.0928	0.705488	4.26575	0
591	(BIRC3) baculoviral IAP repeat-containing 3	2.94765	1.9347	0.656353	3.82299	0
19692	(NRBF2) nuclear receptor binding factor 2	2.94678	1.9121	0.648879	3.76357	0
16952	(TXNIP) thioredoxin interacting protein	2.93459	1.4674	0.500035	2.76523	0
7783	(NFE2L3) nuclear factor (erythroid-derived 2)-like 3	2.93337	2.0838	0.710378	4.23922	0
24693	(MICAL2) microtubule associated monoxygenase, calponin and LIM domain containing 2	2.9201	2.0492	0.701757	4.13876	0
10698	(SEC14L1) SEC14-like 1 (S. cerevisiae)	2.91367	1.1778	0.404232	2.26232	0
19006	(HIPK1) homeodomain interacting protein kinase 1	2.91022	1.32321	0.454678	2.50222	0
5234	(HSPA1L) heat shock 70kDa protein 1-like	2.89625	1.18858	0.410386	2.27928	0
20498	(C14orf159) chromosome 14 open reading frame 159	2.8939	1.01941	0.352262	2.02709	0
9240	(PPBP) pro-platelet basic protein (chemokine (C-X-C motif) ligand 7)	2.88697	2.9808	1.0325	7.89424	0
7534	(MXI1) MAX interactor 1	2.87461	2.05945	0.716427	4.16827	0
18019	(ZFAND3) zinc finger, AN1-type domain 3	2.86926	1.2984	0.452522	2.45956	0
8062	(NUP153) nucleoporin 153kDa	2.86508	1.2718	0.443898	2.41463	0
29831	(NADK) NAD kinase	2.86078	1.56919	0.548517	2.96738	0
30002	(IQWD1) IQ motif and WD repeats 1	2.85185	1.0634	0.372881	2.08985	0
6130	(ISG20) interferon stimulated exonuclease gene 20kDa	2.8449	2.9878	1.05023	7.93263	0
16900	(SMNDC1) survival motor neuron domain containing 1	2.84052	1.6195	0.570142	3.07269	0
18345	(FAM46A) family with sequence similarity 46, member A	2.83995	1.98562	0.699173	3.96032	0
26065	(TESC) tescalcin	2.83003	1.5758	0.556814	2.98101	0
6871	(MAPK1) mitogen-activated protein kinase 1	2.82139	1.00852	0.357456	2.01185	0
Genes more highly expressed in in vivo studies (156)
Gene ID	Gene Name	Score(d)	Numerator(r)	Denominator(s+s0)	Fold Change	q-value(%)
4313	(GLDC) glycine dehydrogenase (decarboxylating)	-4.88417	-3.2833	0.672233	0.102714	0
10384	(RPS11) ribosomal protein S11	-4.5393	-1.64344	0.362047	0.320092	0
28961	(KIAA0101) KIAA0101	-4.41011	-4.2846	0.971541	0.0513106	0
10044	(RNASE1) ribonuclease, RNase A family, 1 (pancreatic)	-4.38624	-3.75505	0.856097	0.0740657	0
30167	(PDIA4) protein disulfide isomerase family A, member 4	-4.33754	-2.3274	0.536571	0.199243	0
9722	(ALDH18A1) aldehyde dehydrogenase 18 family, member A1	-4.27258	-1.9323	0.452256	0.262011	0
11326	(SSR4) signal sequence receptor, delta (translocon-associated protein delta)	-4.23581	-2.3289	0.549813	0.199036	0
7548	(MYBL2) v-myb myeloblastosis viral oncogene homolog (avian)-like 2	-4.23576	-2.96441	0.699855	0.128122	0
380	(AKR1A1) aldo-keto reductase family 1, member A1 (aldehyde reductase)	-4.06159	-2.0834	0.512952	0.235958	0
3718	(FKBP2) FK506 binding protein 2, 13kDa	-4.05238	-1.9898	0.49102	0.251774	0
12641	(UXT) ubiquitously-expressed transcript	-4.04534	-1.18771	0.2936	0.438999	0
17028	(SNF8) SNF8, ESCRT-II complex subunit, homolog (S. cerevisiae)	-4.02778	-1.5321	0.380383	0.345774	0
11010	(SLC2A5) solute carrier family 2 (facilitated glucose/fructose transporter), member 5	-3.87355	-2.15291	0.555798	0.224858	0
593	(BIRC5) baculoviral IAP repeat-containing 5	-3.82767	-2.19273	0.572864	0.218737	0
6510	(STMN1) stathmin 1/oncoprotein 18	-3.82493	-2.5114	0.656588	0.175385	0
9255	(PPIB) peptidylprolyl isomerase B (cyclophilin B)	-3.81764	-2.4936	0.653179	0.177563	0
12028	(HSP90B1) heat shock protein 90kDa beta (Grp94), member 1	-3.81556	-3.2031	0.839483	0.108585	0
1164	(C11orf10) chromosome 11 open reading frame 10	-3.76994	-1.9998	0.530459	0.250035	0
16688	(YIF1A) Yip1 interacting factor homolog A (S. cerevisiae)	-3.74531	-1.7753	0.474007	0.292134	0
29812	(DCPS) decapping enzyme, scavenger	-3.74049	-1.8811	0.502903	0.271477	0
10382	(RPN2) ribophorin II	-3.73165	-2.4412	0.654188	0.18413	0
25538	(DARS2) aspartyl-tRNA synthetase 2, mitochondrial	-3.72838	-1.95507	0.524374	0.257909	0
186	(ADA) adenosine deaminase	-3.6988	-1.7744	0.479723	0.292316	0
1857	(CENPF) centromere protein F, 350/400ka (mitosin)	-3.66256	-2.32159	0.633871	0.200047	0
1458	(CALU) calumenin	-3.65811	-1.97276	0.539283	0.254766	0
123	(ACP2) acid phosphatase 2, lysosomal	-3.62724	-1.49976	0.413472	0.353612	0
28150	(CRELD2) cysteine-rich with EGF-like domains 2	-3.61425	-2.28187	0.631356	0.20563	0
9716	(PXMP2) peroxisomal membrane protein 2, 22kDa	-3.60299	-2.14349	0.59492	0.226332	0
343	(AHCY) S-adenosylhomocysteine hydrolase	-3.56599	-2.4836	0.696468	0.178798	0
16369	(PARK7) Parkinson disease (autosomal recessive, early onset) 7	-3.56277	-1.7314	0.485971	0.30116	0
15927	(ERGIC3) ERGIC and golgi 3	-3.5577	-1.5599	0.438457	0.339175	0
7849	(NME1) non-metastatic cells 1, protein (NM23A) expressed in	-3.55673	-1.72668	0.485468	0.302146	0
9543	(PSMB6) proteasome (prosome, macropain) subunit, beta type, 6	-3.5328	-1.78058	0.504014	0.291066	0
11913	(TNFRSF17) tumor necrosis factor receptor superfamily, member 17	-3.52662	-2.4019	0.681076	0.189215	0
16855	(TRAM2) translocation associated membrane protein 2	-3.48962	-2.4415	0.699646	0.184092	0
10990	(SLC25A4) solute carrier family 25 (mitochondrial carrier; adenine nucleotide translocator), member 4	-3.48339	-2.91316	0.836301	0.132755	0
16948	(C19orf10) chromosome 19 open reading frame 10	-3.48018	-2.29956	0.660758	0.203125	0
8630	(PEBP1) phosphatidylethanolamine binding protein 1	-3.47268	-1.3931	0.40116	0.380746	0
9352	(PRDX1) peroxiredoxin 1	-3.45799	-2.35361	0.680628	0.195656	0
14629	(CDCA8) cell division cycle associated 8	-3.41528	-2.8343	0.829887	0.140214	0
1148	(BUB1) budding uninhibited by benzimidazoles 1 homolog (yeast)	-3.3968	-3.0068	0.885185	0.124412	0
1242	(C1QB) complement component 1, q subcomponent, B chain	-3.38799	-3.733	1.10183	0.0752064	0
5716	(IGKC) immunoglobulin kappa constant	-3.38543	-2.31304	0.683235	0.201235	0
7702	(NDUFB7) NADH dehydrogenase (ubiquinone) 1 beta subcomplex, 7, 18kDa	-3.3754	-1.57	0.46513	0.336808	0
6822	(MAN1A2) mannosidase, alpha, class 1A, member 2	-3.37302	-2.02696	0.600933	0.245372	0
8536	(P2RX5) purinergic receptor P2X, ligand-gated ion channel, 5	-3.35896	-2.0161	0.600215	0.247226	0
17587	(MTCH2) mitochondrial carrier homolog 2 (C. elegans)	-3.35314	-1.6539	0.493238	0.31778	0
3700	(FH) fumarate hydratase	-3.34709	-1.8848	0.563117	0.270781	0
7703	(NDUFB8) NADH dehydrogenase (ubiquinone) 1 beta subcomplex, 8, 19kDa	-3.33936	-1.544	0.462363	0.342933	0
4248	(GGH) gamma-glutamyl hydrolase (conjugase, folylpolygammaglutamyl hydrolase)	-3.33904	-2.9445	0.881841	0.129902	0
18624	(FKBP11) FK506 binding protein 11, 19 kDa	-3.33586	-2.6608	0.797635	0.158132	0
16919	(VAT1) vesicle amine transport protein 1 homolog (T. californica)	-3.33577	-1.6605	0.497786	0.316329	0
9439	(DNAJC3) DnaJ (Hsp40) homolog, subfamily C, member 3	-3.33179	-1.9099	0.573236	0.266111	0
8646	(PCBD1) pterin-4 alpha-carbinolamine dehydratase/dimerization cofactor of hepatocyte nuclear factor 1 alpha	-3.32949	-1.23696	0.371516	0.424266	0
12585	(UQCRC1) ubiquinol-cytochrome c reductase core protein I	-3.32608	-1.4696	0.441842	0.361082	0
11989	(TOP2A) topoisomerase (DNA) II alpha 170kDa	-3.32577	-3.5472	1.06658	0.0855434	0
14559	(STOML2) stomatin (EPB72)-like 2	-3.31919	-2.0456	0.616296	0.242222	0
1578	(CCNA2) cyclin A2	-3.314	-2.5354	0.765058	0.172492	0
29594	(UQCRQ) ubiquinol-cytochrome c reductase, complex III subunit VII, 9.5kDa	-3.3009	-1.9445	0.589081	0.259805	0
848	(ATP5J2) ATP synthase, H+ transporting, mitochondrial F0 complex, subunit F2	-3.27382	-1.7835	0.544776	0.290478	0
3482	(ETFB) electron-transfer-flavoprotein, beta polypeptide	-3.26178	-1.6502	0.505921	0.318596	0
13509	(AVEN) apoptosis, caspase activation inhibitor	-3.24374	-2.2001	0.67826	0.217623	0
14512	(MRPS27) mitochondrial ribosomal protein S27	-3.23489	-1.75645	0.542971	0.295975	0
20266	(ALG5) asparagine-linked glycosylation 5, dolichyl-phosphate beta-glucosyltransferase homolog (S. cerevisiae)	-3.21029	-1.8904	0.588857	0.269732	0
8923	(PHGDH) phosphoglycerate dehydrogenase	-3.19343	-2.34939	0.735694	0.196229	0
12383	(TSSC1) tumor suppressing subtransferable candidate 1	-3.1899	-1.4747	0.462303	0.359808	0
9751	(QARS) glutaminyl-tRNA synthetase	-3.16824	-1.4719	0.464579	0.360507	0
28775	(TMEM106C) transmembrane protein 106C	-3.1613	-1.7511	0.553918	0.297075	0
12587	(UQCRFS1) ubiquinol-cytochrome c reductase, Rieske iron-sulfur polypeptide 1	-3.15873	-1.3149	0.416276	0.401953	0
2903	(DLG4) discs, large homolog 4 (Drosophila)	-3.14003	-1.23129	0.392127	0.425937	0
6236	(KCNC4) potassium voltage-gated channel, Shaw-related subfamily, member 4	-3.1326	-2.04823	0.653844	0.24178	0
841	(ATP5G1) ATP synthase, H+ transporting, mitochondrial F0 complex, subunit C1 (subunit 9)	-3.1304	-1.66759	0.532707	0.314779	0
21076	(TMEM14A) transmembrane protein 14A	-3.12933	-1.51636	0.484563	0.349567	0
5713	(IGJ) immunoglobulin J polypeptide, linker protein for immunoglobulin alpha and mu polypeptides	-3.12217	-2.58865	0.829119	0.166242	0
14499	(MRPS7) mitochondrial ribosomal protein S7	-3.11673	-1.7367	0.557219	0.300055	0
1172	(C11orf2) chromosome 11 open reading frame2	-3.11395	-1.39482	0.447927	0.380292	0
21348	(MLF1IP) MLF1 interacting protein	-3.11253	-2.50519	0.804872	0.176142	0
12393	(TTC3) tetratricopeptide repeat domain 3	-3.08282	-1.27416	0.413308	0.413467	0
23571	(COBLL1) COBL-like 1	-3.07667	-2.3493	0.763586	0.196241	0
20664	(H2AFV) H2A histone family, member V	-3.07063	-1.52726	0.497377	0.346935	0
823	(ATP5A1) ATP synthase, H+ transporting, mitochondrial F1 complex, alpha subunit 1, cardiac muscle	-3.06847	-1.40489	0.457847	0.377647	0
6305	(KDELR2) KDEL (Lys-Asp-Glu-Leu) endoplasmic reticulum protein retention receptor 2	-3.06204	-2.678	0.87458	0.156258	0
9141	(PMVK) phosphomevalonate kinase	-3.06104	-1.6066	0.524854	0.328371	0
2728	(DDOST) dolichyl-diphosphooligosaccharide-protein glycosyltransferase	-3.05598	-1.888	0.617805	0.270181	0
26278	(ISOC2) isochorismatase domain containing 2	-3.05087	-1.59103	0.5215	0.331934	0
14054	(MRPL15) mitochondrial ribosomal protein L15	-3.048	-1.48371	0.486782	0.357568	0
12441	(TYMS) thymidylate synthetase	-3.04305	-4.0816	1.34128	0.0590631	0
10369	(RPL9) ribosomal protein L9	-3.02912	-1.8885	0.623449	0.270088	0
89	(ACADM) acyl-Coenzyme A dehydrogenase, C-4 to C-12 straight chain	-3.0188	-2.1493	0.711972	0.225422	0
9820	(RAD51C) RAD51 homolog C (S. cerevisiae)	-3.00248	-1.2444	0.414457	0.422083	0
1241	(C1QA) complement component 1, q subcomponent, A chain	-3.00046	-3.33585	1.11178	0.0990399	0
25849	(C16orf59) chromosome 16 open reading frame 59	-2.99821	-2.58298	0.861508	0.166896	0
7691	(NDUFA7) NADH dehydrogenase (ubiquinone) 1 alpha subcomplex, 7, 14.5kDa	-2.99749	-1.821	0.607509	0.283025	0
17194	(NDUFA13) NADH dehydrogenase (ubiquinone) 1 alpha subcomplex, 13	-2.98787	-1.4923	0.499452	0.355445	0
6726	(CD180) CD180 molecule	-2.98623	-1.6888	0.565529	0.310185	0
9690	(PTTG1) pituitary tumor-transforming 1	-2.98546	-2.5033	0.838497	0.176373	0
7698	(NDUFB3) NADH dehydrogenase (ubiquinone) 1 beta subcomplex, 3, 12kDa	-2.9845	-1.6607	0.556442	0.316286	0
291	(ADSL) adenylosuccinate lyase	-2.98226	-1.4414	0.483325	0.36821	0
12801	(XBP1) X-box binding protein 1	-2.97872	-2.0527	0.689122	0.241033	0
18471	(ZDHHC4) zinc finger, DHHC-type containing 4	-2.97696	-1.25197	0.420553	0.419874	0
14049	(MRPS14) mitochondrial ribosomal protein S14	-2.97642	-1.26747	0.425836	0.415389	0
8883	(PFTK1) PFTAIRE protein kinase 1	-2.9764	-2.61751	0.879422	0.162949	0
10760	(SET) SET nuclear oncogene	-2.97193	-1.22748	0.413024	0.427063	0
4432	(GOT1) glutamic-oxaloacetic transaminase 1, soluble (aspartate aminotransferase 1)	-2.96722	-1.841	0.620446	0.279128	0
1174	(C11orf24) chromosome 11 open reading frame 24	-2.96591	-1.4871	0.501398	0.356729	0
23401	(SPCS1) signal peptidase complex subunit 1 homolog (S. cerevisiae)	-2.96534	-1.6366	0.551911	0.321614	0
10475	(RUVBL2) RuvB-like 2 (E. coli)	-2.96397	-2.20821	0.745018	0.216403	0
5870	(IGLL1) immunoglobulin lambda-like polypeptide 1	-2.95847	-2.16838	0.732939	0.222461	0
14034	(MRPL37) mitochondrial ribosomal protein L37	-2.95837	-1.75502	0.593238	0.296269	0
15746	(TOMM34) translocase of outer mitochondrial membrane 34	-2.94914	-1.2626	0.428124	0.416792	0
6053	(IMPDH2) IMP (inosine monophosphate) dehydrogenase 2	-2.94899	-1.5093	0.511802	0.351282	0
6949	(MCM6) minichromosome maintenance complex component 6	-2.94781	-1.81381	0.615307	0.284439	0
11449	(SUCLG1) succinate-CoA ligase, alpha subunit	-2.94691	-1.09623	0.371994	0.467737	0
29266	(KLHL14) kelch-like 14 (Drosophila)	-2.94467	-2.52878	0.858765	0.173285	0
24878	(TMED9) transmembrane emp24 protein transport domain containing 9	-2.92447	-1.15756	0.395818	0.44827	0
7717	(NDUFV2) NADH dehydrogenase (ubiquinone) flavoprotein 2, 24kDa	-2.92323	-1.28034	0.437988	0.411699	0
843	(ATP5G3) ATP synthase, H+ transporting, mitochondrial F0 complex, subunit C3 (subunit 9)	-2.9232	-1.69122	0.578551	0.309664	0
3259	(EIF2B3) eukaryotic translation initiation factor 2B, subunit 3 gamma, 58kDa	-2.91986	-2.06521	0.707299	0.238952	0
16062	(CRTC1) CREB regulated transcription coactivator 1	-2.91702	-1.61913	0.555063	0.325532	0
11586	(TBL2) transducin (beta)-like 2	-2.90152	-1.09925	0.378854	0.466759	0
18628	(STAB1) stabilin 1	-2.90103	-1.59298	0.549109	0.331486	0
24811	(PDIA5) protein disulfide isomerase family A, member 5	-2.89829	-2.102	0.725256	0.232935	0
11317	(SSBP1) single-stranded DNA binding protein 1	-2.89654	-1.4365	0.495936	0.369463	0
12590	(UQCRH) ubiquinol-cytochrome c reductase hinge protein	-2.89459	-1.86051	0.642755	0.275379	0
10396	(RPS16) ribosomal protein S16	-2.89271	-2.0739	0.716939	0.237517	0
7850	(NME2) non-metastatic cells 2, protein (NM23B) expressed in	-2.88216	-1.96066	0.680277	0.25691	0
1774	(CDK5) cyclin-dependent kinase 5	-2.86939	-1.3682	0.476827	0.387374	0
16993	(SEC61B) Sec61 beta subunit	-2.8635	-1.5564	0.543531	0.339998	0
20325	(DNAJC15) DnaJ (Hsp40) homolog, subfamily C, member 15	-2.86209	-1.6524	0.57734	0.318111	0
7104	(MIPEP) mitochondrial intermediate peptidase	-2.8584	-1.5752	0.551078	0.335597	0
14651	(PPIH) peptidylprolyl isomerase H (cyclophilin H)	-2.85507	-1.0709	0.375087	0.476022	0
10549	(ATXN10) ataxin 10	-2.85195	-1.1149	0.390925	0.461723	0
10991	(SLC25A5) solute carrier family 25 (mitochondrial carrier; adenine nucleotide translocator), member 5	-2.85037	-1.566	0.549402	0.337744	0
20084	(DDX54) DEAD (Asp-Glu-Ala-Asp) box polypeptide 54	-2.84734	-1.15723	0.406426	0.448372	0
3133	(EBP) emopamil binding protein (sterol isomerase)	-2.84286	-1.6888	0.59405	0.310185	0
7966	(NR1H3) nuclear receptor subfamily 1, group H, member 3	-2.83192	-2.1567	0.761568	0.224269	0
3560	(FABP5) fatty acid binding protein 5 (psoriasis-associated)	-2.83181	-2.2287	0.787023	0.213351	0
16634	(MRPS33) mitochondrial ribosomal protein S33	-2.82982	-1.84916	0.653455	0.277554	0
21078	(HDDC2) HD domain containing 2	-2.82599	-1.1798	0.417482	0.441413	0
30306	(PHB2) prohibitin 2	-2.81522	-1.2664	0.449841	0.415696	0
8987	(PIM2) pim-2 oncogene	-2.81359	-1.3887	0.493569	0.381909	0
2861	(DHFR) dihydrofolate reductase	-2.80346	-2.4808	0.884907	0.179145	0
18808	(BZW2) basic leucine zipper and W2 domains 2	-2.80328	-1.6842	0.600795	0.311175	0
14348	(HTRA2) HtrA serine peptidase 2	-2.80072	-1.05872	0.378017	0.480058	0
18175	(COQ3) coenzyme Q3 homolog, methyltransferase (S. cerevisiae)	-2.79782	-1.44726	0.51728	0.366718	0
11474	(SURF1) surfeit 1	-2.78912	-1.2422	0.445374	0.422728	0
14050	(MRPS11) mitochondrial ribosomal protein S11	-2.78641	-1.14786	0.411951	0.451293	0
19955	(KIAA0125) KIAA0125	-2.77475	-1.8453	0.665034	0.278297	0
13744	(HERPUD1) homocysteine-inducible, endoplasmic reticulum stress-inducible, ubiquitin-like domain member 1	-2.77449	-1.28701	0.463875	0.409798	0
4208	(GCSH) glycine cleavage system protein H (aminomethyl carrier)	-2.76857	-1.81411	0.655251	0.28438	0
18276	(SEC61A1) Sec61 alpha 1 subunit (S. cerevisiae)	-2.76757	-1.5397	0.556337	0.343957	0
3003	(DPH1) DPH1 homolog (S. cerevisiae)	-2.76675	-1.00243	0.362315	0.499157	0
24090	(C2orf28) chromosome 2 open reading frame 28	-2.76231	-1.3169	0.476738	0.401397	0
29609	(ACP6) acid phosphatase 6, lysophosphatidic	-2.75793	-1.4396	0.521985	0.36867	0
4433	(GOT2) glutamic-oxaloacetic transaminase 2, mitochondrial (aspartate aminotransferase 2)	-2.75426	-1.7256	0.626521	0.302373	0
17064	(ELL2) elongation factor, RNA polymerase II, 2	-2.74826	-1.9638	0.714561	0.256352	0
